# Supplementary material
Source: Springer Nature journal article supplement (https://www.springermedizin.de/resource/supplementary/12883_2013_847_MOESM1_ESM.pdf/9455972)

Start of therapy

Enrollment

3

6

12

24 Months

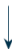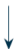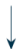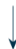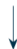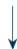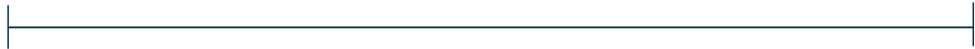

DID-r

Dose  
titration  
phase

DID-nr

PD

Supplement: MOESM1 [file 9455972]
